# Supplementary material for: Clinical prediction models to diagnose neonatal sepsis: a scoping review protocol
Source: PubMed Central journal article supplement — BMJ Open. 2020 Aug 20;10(8):e039712. doi: 10.1136/bmjopen-2020-039712 (PMC7440696; doi:10.1136/bmjopen-2020-039712), 2020-08-20
Supplement: bmjopen-2020-039712supp001.pdf [file bmjopen-2020-039712supp001.pdf]

## Supplementary appendix

### CONTENTS

1. Search strategies for each database
2. Draft data extraction form

### 1. SEARCH STRATEGIES FOR EACH DATABASE

#### Ovid MEDLINE

|    |                                                                                                                                                                         |
|----|-------------------------------------------------------------------------------------------------------------------------------------------------------------------------|
| 1  | exp Infant, Newborn/                                                                                                                                                    |
| 2  | (neonat* or newborn* or new born* or baby or babies or premature or preterm or infant* or low birth weight or LBW or VLBW or ELBW or NICU*).ti,ab,kw.                   |
| 3  | 1 or 2                                                                                                                                                                  |
| 4  | exp Sepsis/                                                                                                                                                             |
| 5  | (sepsis or septic* or bacter?emia).ti,ab,kw.                                                                                                                            |
| 6  | 4 or 5                                                                                                                                                                  |
| 7  | Decision Support Techniques/ or Neonatal Screening/                                                                                                                     |
| 8  | ((predict* or diagnos* or screen* or identif* or manag*) adj5 (model* or rule* or scor* or tool* or algorithm* or decision tree* or pathway* or calculator*)).ti,ab,kw. |
| 9  | 7 or 8                                                                                                                                                                  |
| 10 | 3 and 6 and 9                                                                                                                                                           |

#### Ovid Embase

|    |                                                                                                                                                                         |
|----|-------------------------------------------------------------------------------------------------------------------------------------------------------------------------|
| 1  | newborn/                                                                                                                                                                |
| 2  | (neonat* or newborn* or new born* or baby or babies or premature or preterm or infant* or low birth weight or LBW or VLBW or ELBW or NICU*).ti,ab,kw.                   |
| 3  | 1 or 2                                                                                                                                                                  |
| 4  | exp sepsis/                                                                                                                                                             |
| 5  | (sepsis or septic* or bacter?emia).ti,ab,kw.                                                                                                                            |
| 6  | 4 or 5                                                                                                                                                                  |
| 7  | exp decision support system/ or newborn screening/                                                                                                                      |
| 8  | ((predict* or diagnos* or screen* or identif* or manag*) adj5 (model* or rule* or scor* or tool* or algorithm* or decision tree* or pathway* or calculator*)).ti,ab,kw. |
| 9  | 7 or 8                                                                                                                                                                  |
| 10 | 3 and 6 and 9                                                                                                                                                           |

#### Scopus

TITLE-ABS-KEY((neonat\* OR newborn\* OR "new born\*" OR baby OR babies OR premature OR preterm OR infant\* OR "low birth weight" OR lbw OR vlbw OR elbw OR nicu\*) AND (sepsis OR septic\* OR bacter?emia) AND ((predict\* OR diagnos\* OR screen\* OR identif\* OR manag\*) W/5 (model\* OR rule\* OR scor\* OR tool\* OR algorithm\* OR "decision tree\*" OR pathway\* OR calculator\*)))

#### Web of Science

TS=((neonat\* OR newborn\* OR "new born\*" OR baby OR babies OR premature OR preterm OR infant\* OR "low birth weight" OR lbw OR vlbw OR elbw OR nicu\*) AND (sepsis OR septic\* OR bacter?emia) AND ((predict\* OR diagnos\* OR screen\* OR identif\* OR manag\*) NEAR/5 (model\* OR rule\* OR scor\* OR tool\* OR algorithm\* OR "decision tree\*" OR pathway\* OR calculator\*)))

**Globus Index Medicus**

((mh:("Infant, Newborn")) OR (tw:(neonat\* OR newborn\* OR "new born\*" OR baby OR babies OR premature OR preterm OR infant\* OR "low birth weight" OR lbw OR vlbw OR elbw OR nicu\*))) AND ((mh:("Sepsis")) OR (tw:(sepsis OR septic\* OR bacter\*emia))) AND ((mh:("Decision Support Systems, Clinical" OR "Neonatal Screening")) OR (tw:(model\* OR rule\* OR scor\* OR tool\* OR algorithm\* OR "decision tree\*" OR pathway\* OR calculator\*)))

**Cochrane Library**

|    |                                                                                                                                                                                        |
|----|----------------------------------------------------------------------------------------------------------------------------------------------------------------------------------------|
| 1  | MeSH descriptor: [Infant, Newborn] explode all trees                                                                                                                                   |
| 2  | (neonat* or newborn* or "new born*" or baby or babies or premature or preterm or infant* or "low birth weight" or LBW or VLBW or ELBW or NICU*):ti,ab,kw                               |
| 3  | #1 or #2                                                                                                                                                                               |
| 4  | MeSH descriptor: [Sepsis] explode all trees                                                                                                                                            |
| 5  | (sepsis or septic* or bacter*emia):ti,ab,kw                                                                                                                                            |
| 6  | #4 or #5                                                                                                                                                                               |
| 7  | MeSH descriptor: [Decision Support Systems, Clinical] explode all trees                                                                                                                |
| 8  | MeSH descriptor: [Neonatal Screening] explode all trees                                                                                                                                |
| 9  | ((predict* or diagnos* or screen* or identif* or manag* or estimat*) NEAR/5 (model* or rule* or scor* or tool* or algorithm* or "decision tree*" or pathway* or calculator*)):ti,ab,kw |
| 10 | #7 or #8 or #9                                                                                                                                                                         |
| 11 | #3 and #6 and #10                                                                                                                                                                      |

**2. DRAFT DATA EXTRACTION FORM**

| Study Details and Characteristics |                                                      |  |
|-----------------------------------|------------------------------------------------------|--|
| Study ID (Author, year)           |                                                      |  |
| Source of data (e.g. RCT)         |                                                      |  |
| Country                           |                                                      |  |
| Context (e.g. NICU)               |                                                      |  |
| Participants                      | Number                                               |  |
|                                   | Characteristics                                      |  |
| Objectives                        |                                                      |  |
| Study Results                     |                                                      |  |
| Name of prediction model          |                                                      |  |
| Type of model                     |                                                      |  |
| Outcome definition                |                                                      |  |
| Predictors used                   | Symptoms and signs                                   |  |
|                                   | Risk factors                                         |  |
|                                   | Laboratory tests                                     |  |
| Underlying evidence               | Model performance (e.g. specificity and sensitivity) |  |
|                                   | Acceptability                                        |  |
|                                   | Mortality                                            |  |
|                                   | Antibiotic prescriptions                             |  |
|                                   | Other evidence                                       |  |
